# Supplementary figures and images for: Resolving the genetic heterogeneity of prelingual hearing loss within one family: Performance comparison and application of two targeted next generation sequencing approaches
Source: PubMed Central journal article supplement — J Hum Genet. 2014 Sep 18;59(11):599–607. doi: 10.1038/jhg.2014.78 (PMC4521291; doi:10.1038/jhg.2014.78), 2014-09-18

**A** III-4, *CDH23*: c.3016G>A

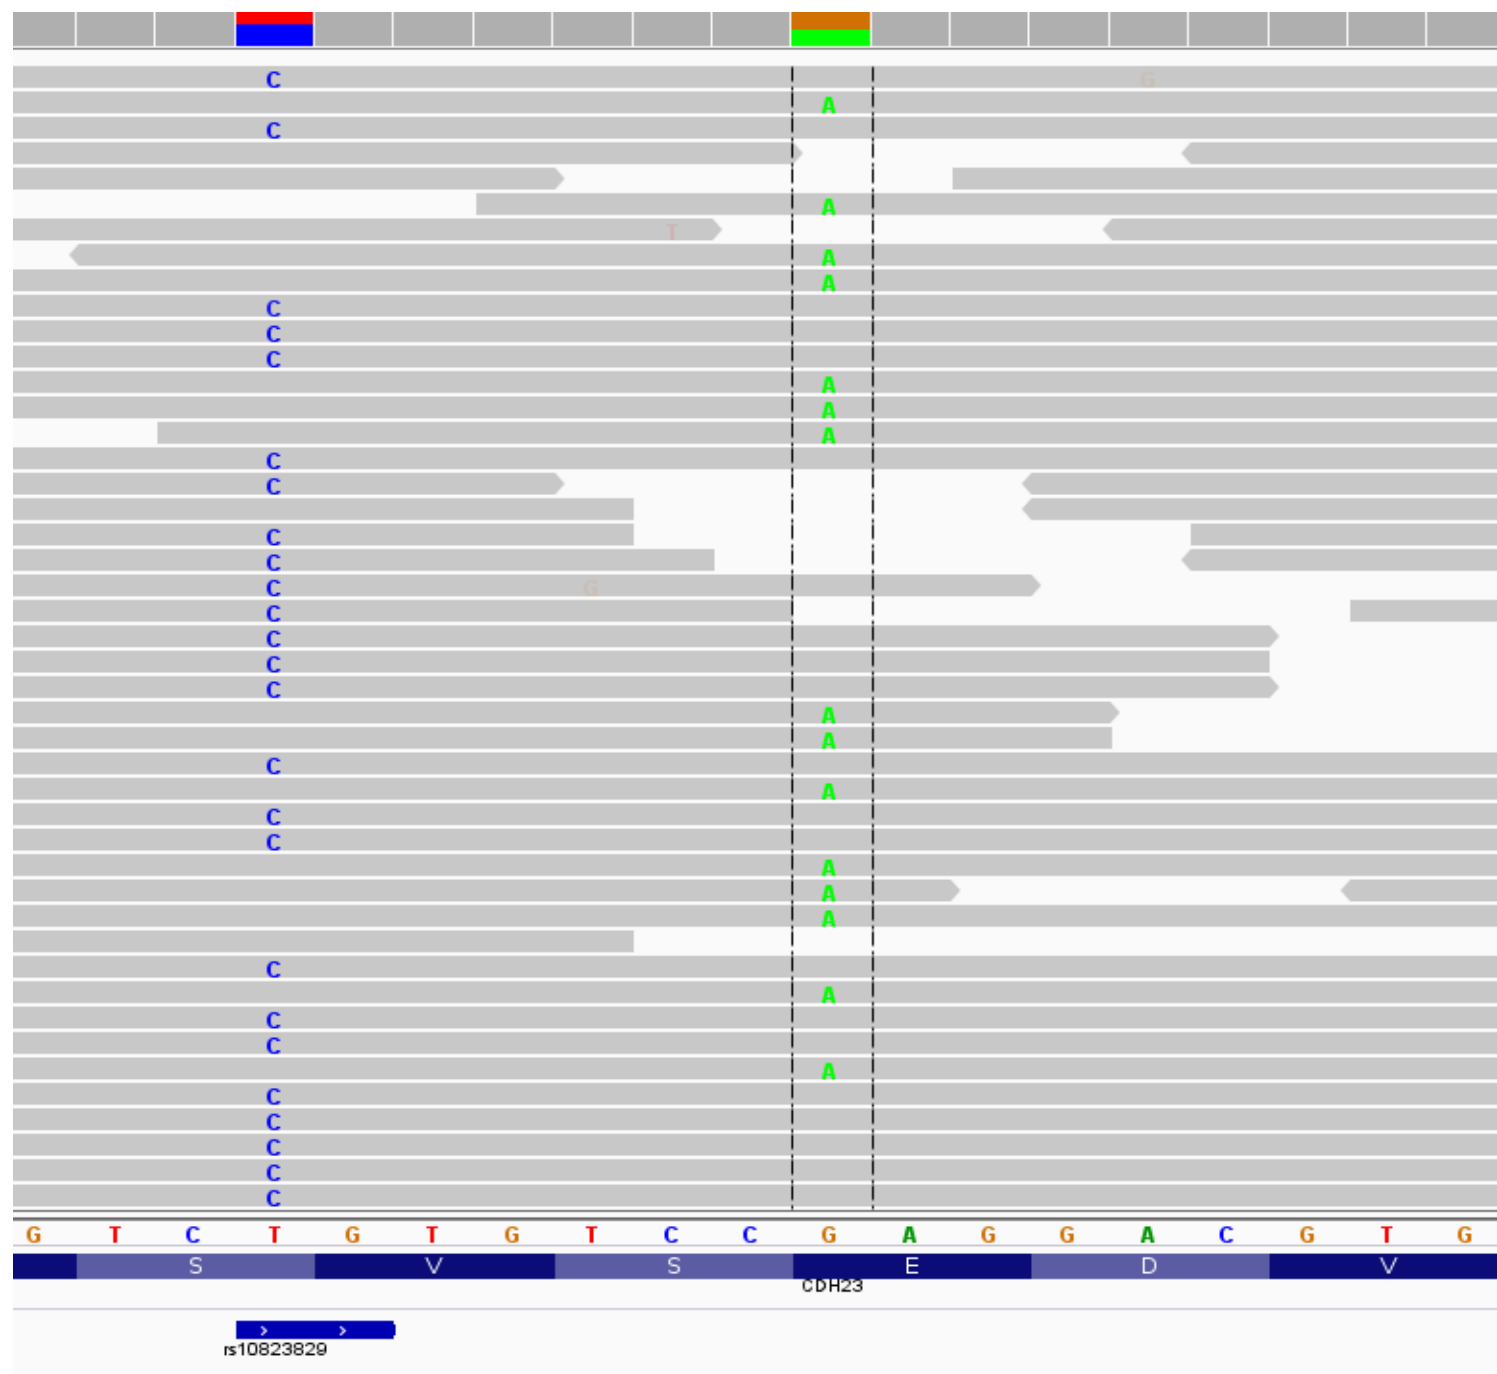

**B** III-4, *CHD23*: c.4988A>T

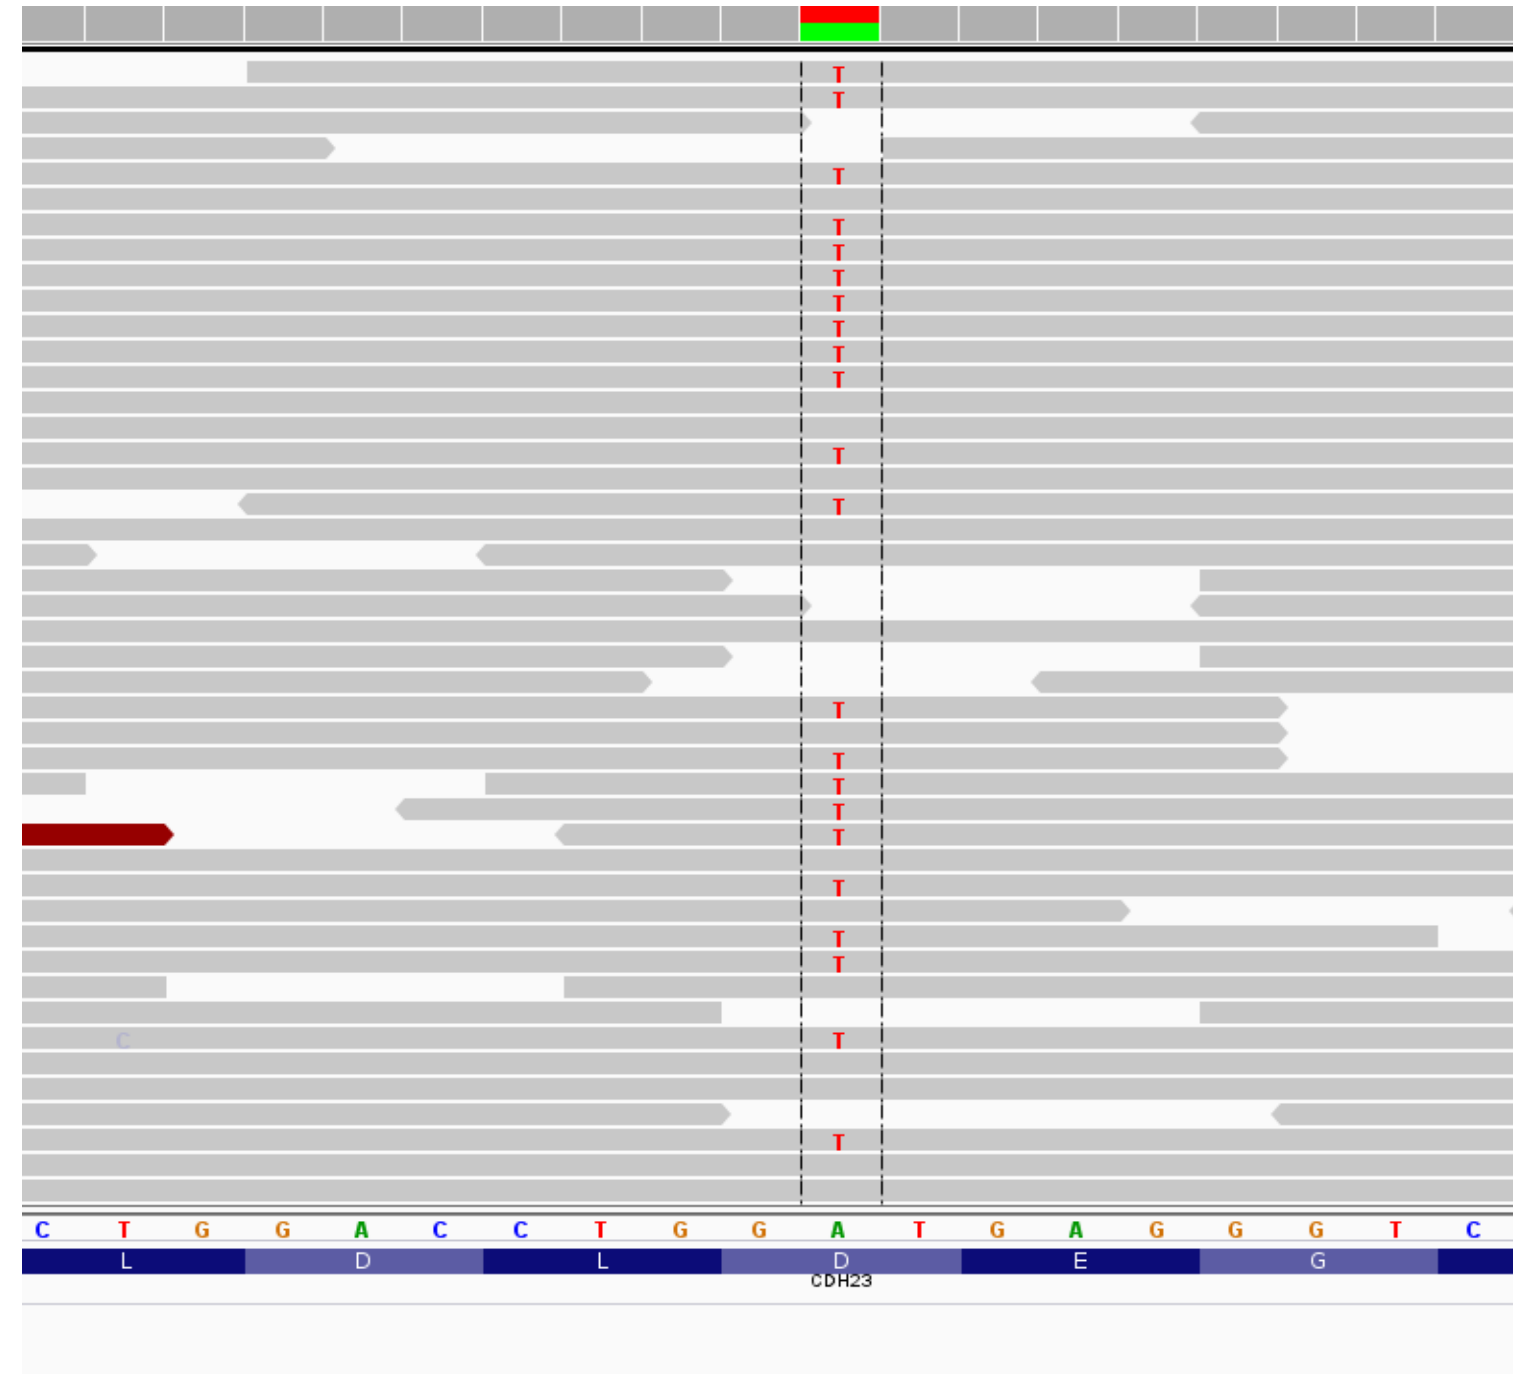

**C** III-13, *SLC26A4*: IVS7-2A>G

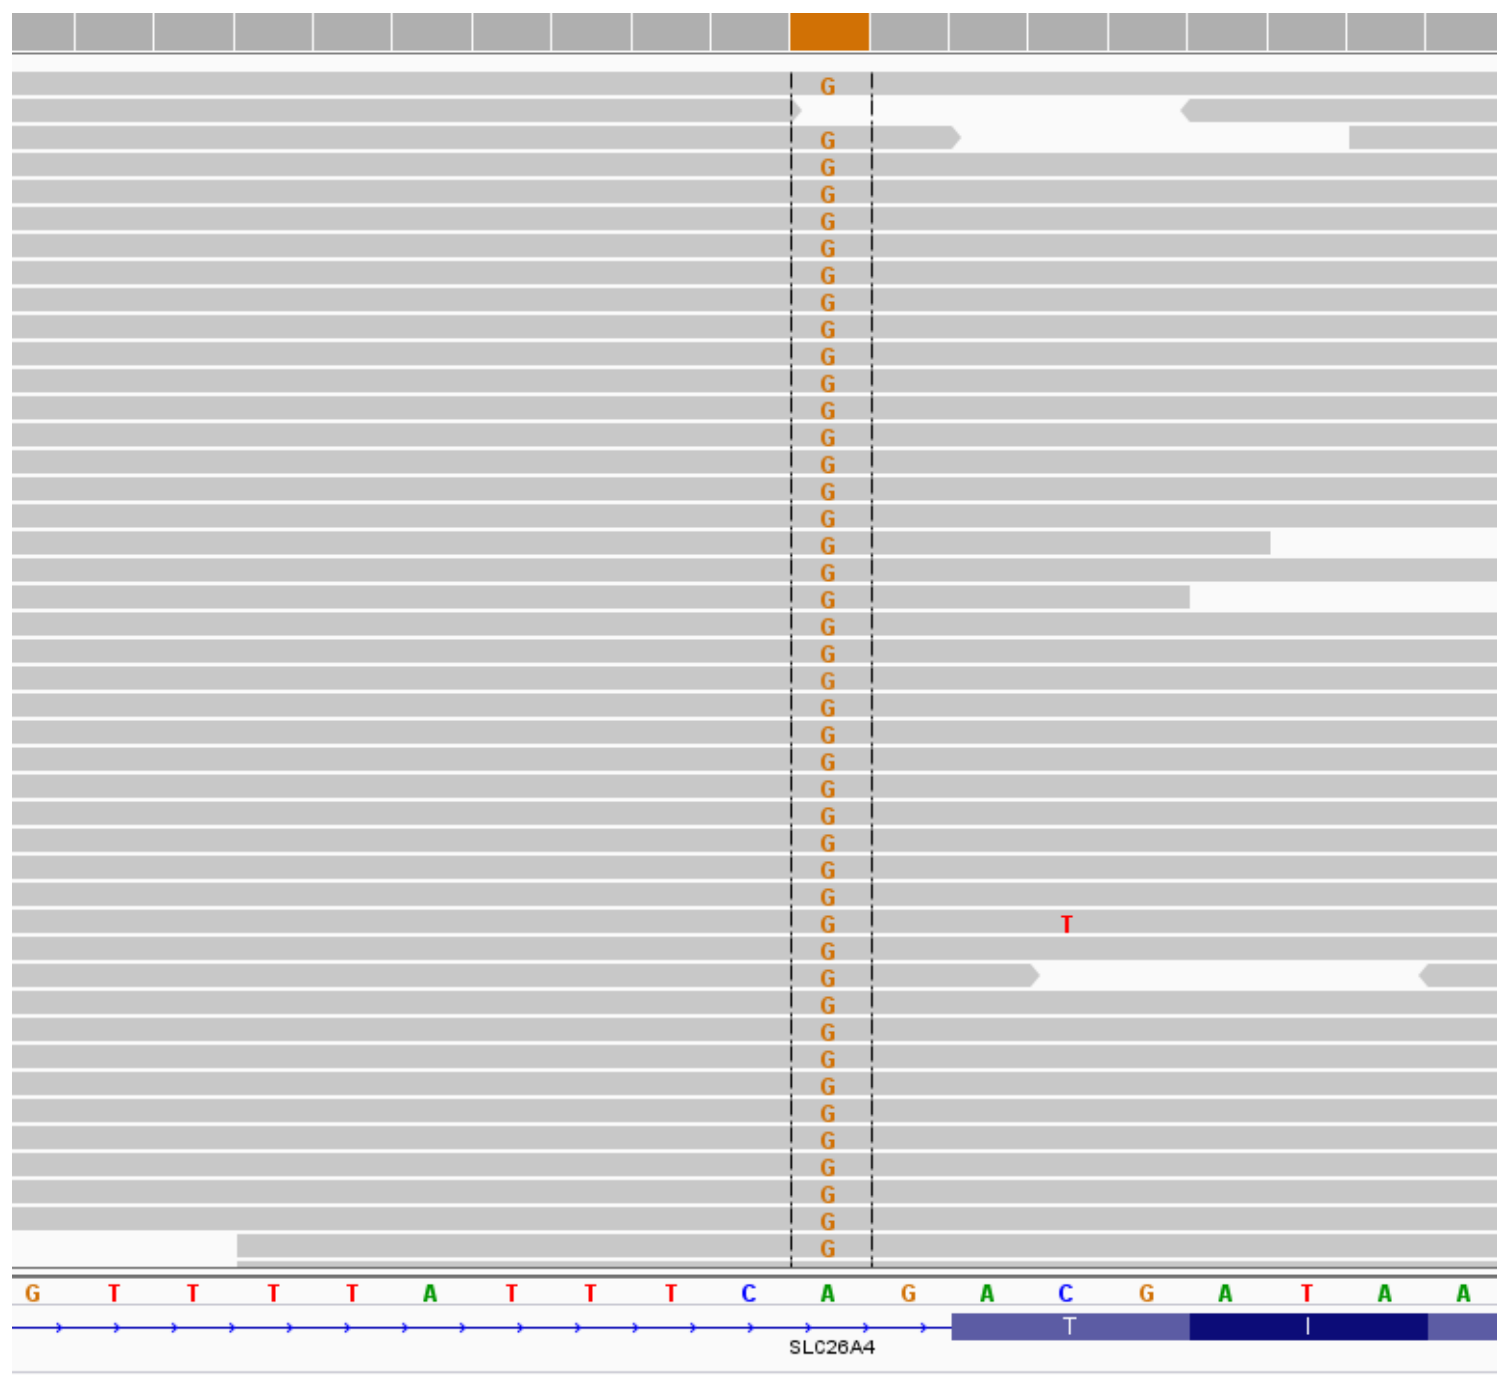

**D** III-13, *CHD23*: c.4988A>T

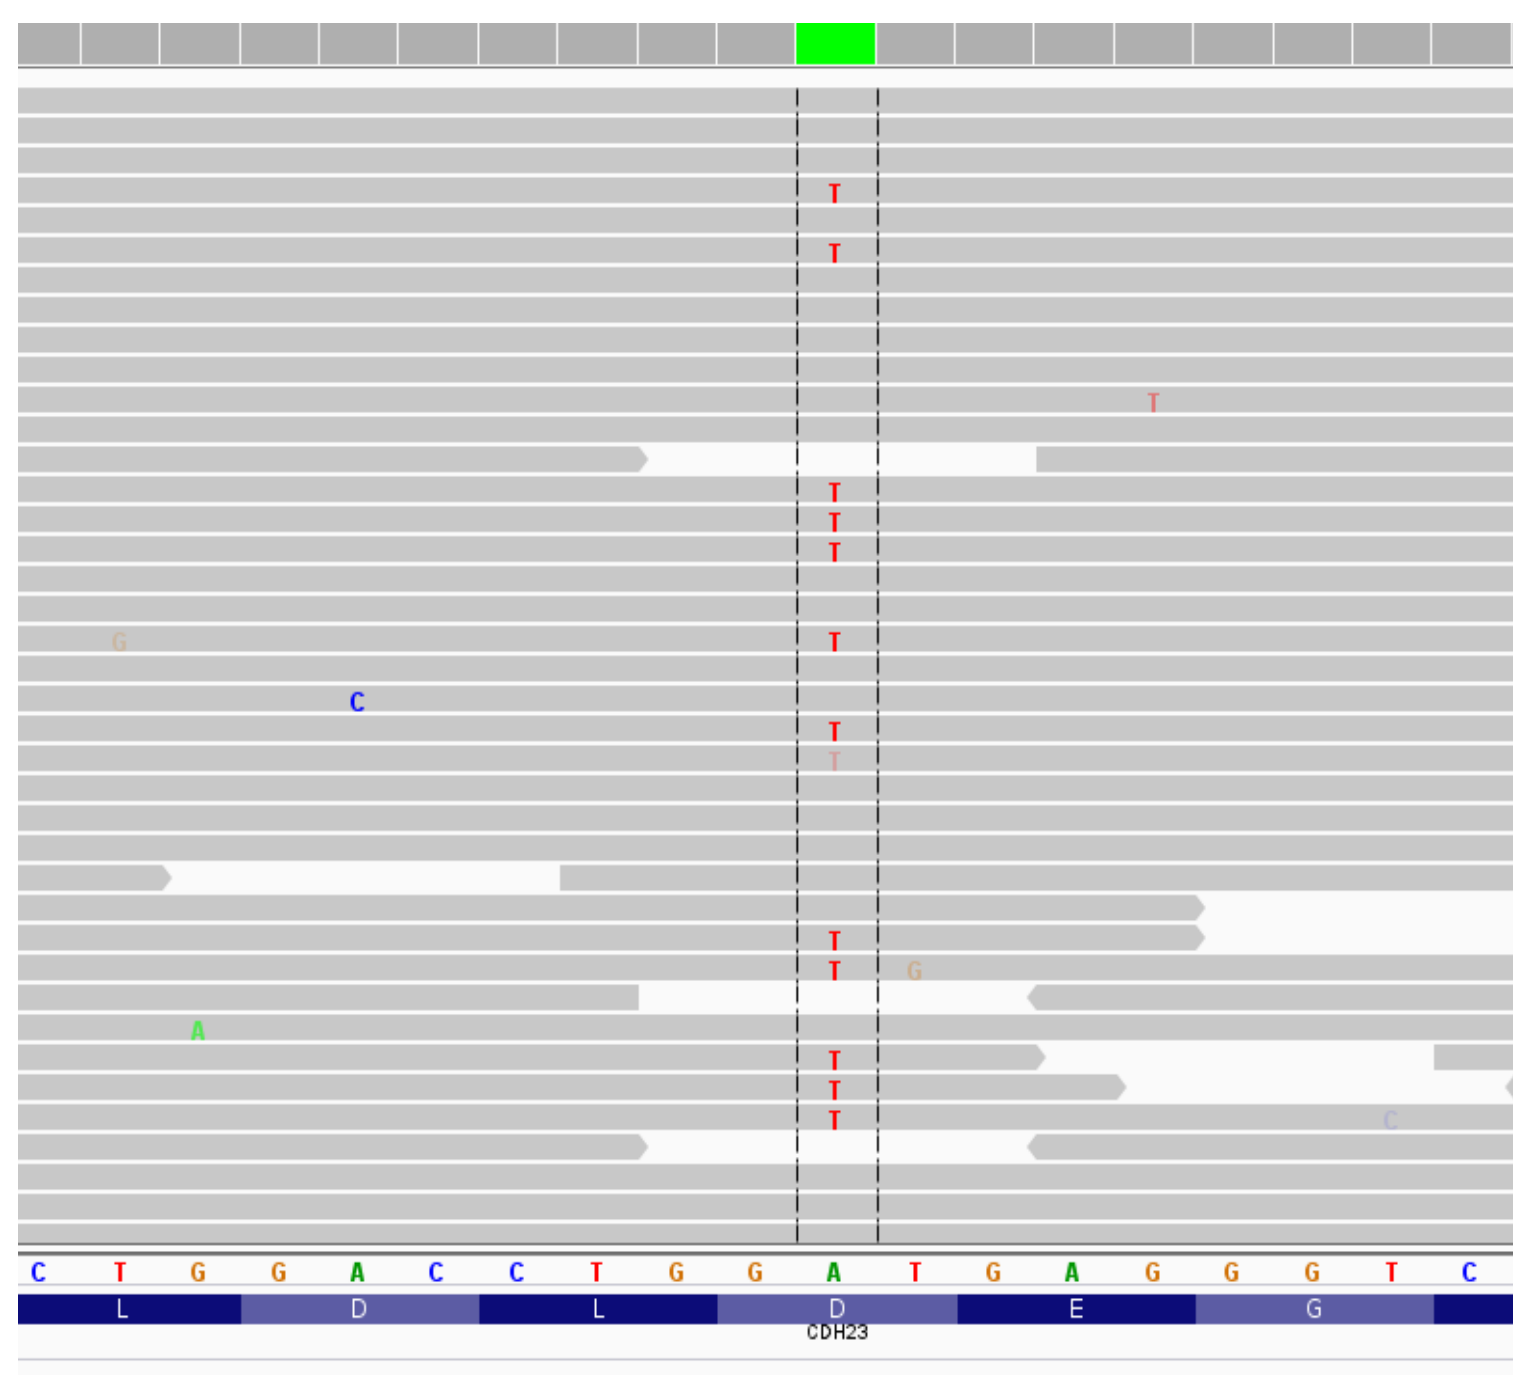

Supplement: jhg201478x2.pdf [file jhg201478x2.pdf]

**A**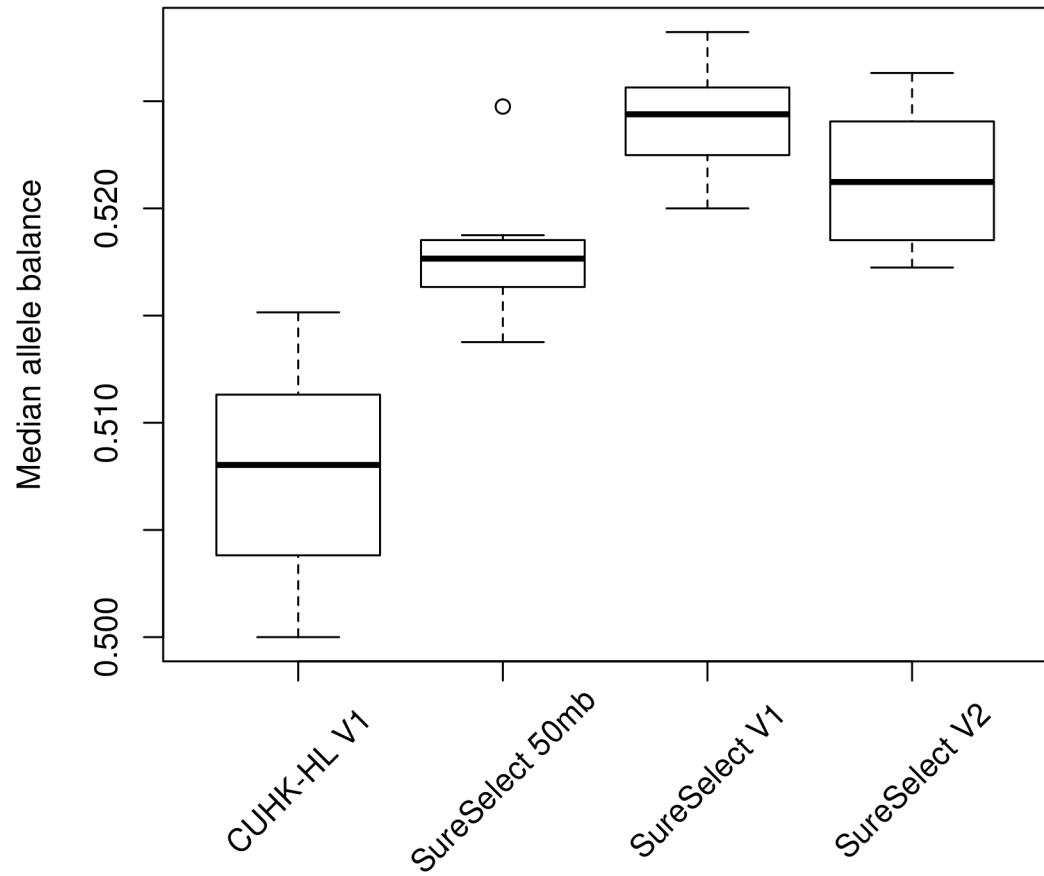**B**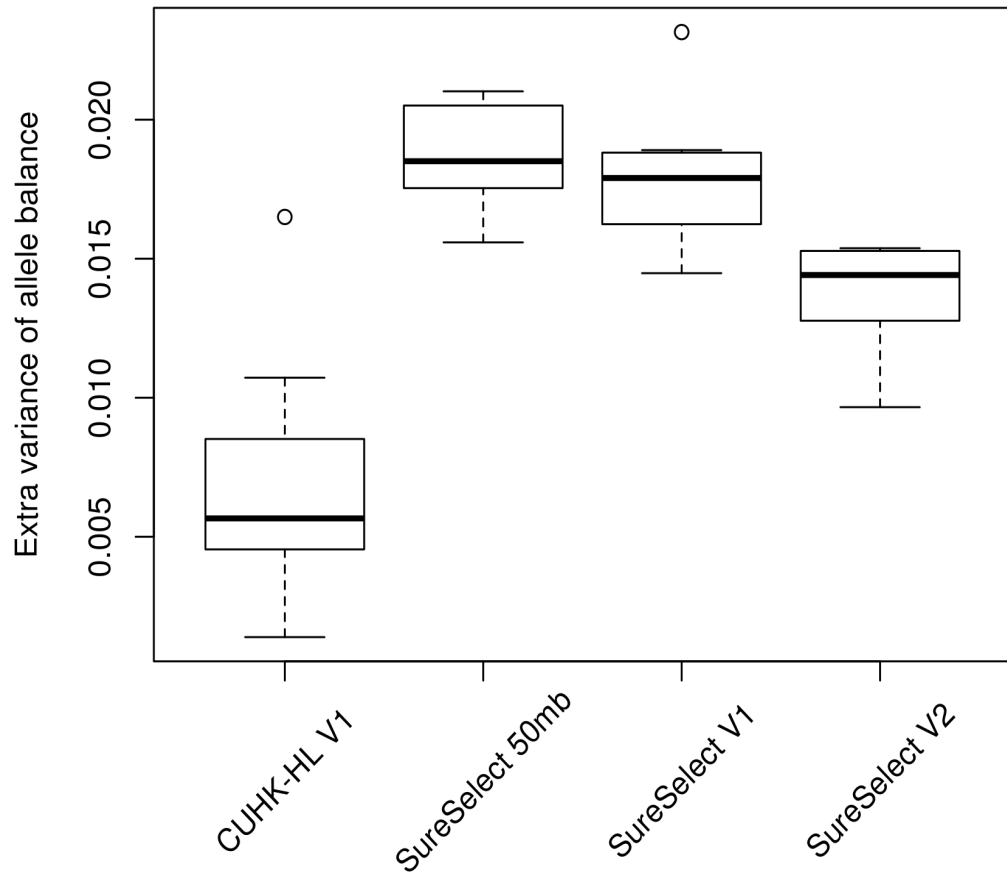

Supplement: jhg201478x3.pdf [file jhg201478x3.pdf]
